1 **Emergence of RBD mutations in circulating SARS-CoV-2 strains enhancing the structural**  
2 **stability and human ACE2 receptor affinity of the spike protein**

3  
4 Junxian Ou,<sup>a</sup> Zhonghua Zhou,<sup>b</sup> Ruixue Dai,<sup>c,f</sup> Jing Zhang,<sup>d</sup> Wendong Lan,<sup>a</sup> Shan Zhao,<sup>a</sup> Jianguo Wu,<sup>d</sup>  
5 Donald Seto,<sup>e</sup> Lilian Cui,<sup>f</sup> Gong Zhang,<sup>b#</sup> Qiwei Zhang<sup>a,d#</sup>

6  
7 <sup>a</sup> Guangdong Provincial Key Laboratory of Tropical Disease Research, School of Public Health,  
8 Southern Medical University, Guangzhou, Guangdong 510515, China

9 <sup>b</sup> Key Laboratory of Functional Protein Research of Guangdong Higher Education Institutes, Institute  
10 of Life and Health Engineering, College of Life Science and Technology, Jinan University,  
11 Guangzhou, Guangdong 510632, China.

12 <sup>c</sup> Department of Environmental Science and Engineering, Fudan University, Shanghai 200433, China

13 <sup>d</sup> Guangdong Provincial Key Laboratory of Virology, Institute of Medical Microbiology, Jinan  
14 University, Guangzhou, Guangdong 510632, China

15 <sup>e</sup> Bioinformatics and Computational Biology Program, School of Systems Biology, George Mason  
16 University, Manassas, VA 20110, USA

17 <sup>f</sup> Novoprotein Scientific Inc. Shanghai 201203, China

18  
19 **Running Head:** RBD mutations enhance human ACE2 receptor affinity

20  
21 **#Address correspondence** to Qiwei Zhang, zhangqw@smu.edu.cn; Gong Zhang,  
22 zhanggong@jnu.edu.cn.

23 J.O., Z.Z., and R.D. contributed equally to this work.

24  
25 **Abstract: 250 words**

26 **Importance: 150 words**

27 **Text: 2694 words**

## 28 **Abstract**

29 A novel coronavirus SARS-CoV-2 is associated with the current global pandemic of Coronavirus  
30 Disease 2019 (COVID-19). Spike protein receptor-binding domain (RBD) of SARS-CoV-2 is the  
31 critical determinant of viral tropism and infectivity. To investigate whether the mutations in the RBD  
32 have altered the receptor binding affinity and caused these strains more infectious, we performed  
33 molecular dynamics simulations of the binding affinity between the mutant SARS-CoV-2 RBDs to  
34 date and the human ACE2 receptor. Among 1609 genomes of global SARS-CoV-2 strains, 32  
35 non-synonymous RBD mutants were identified and clustered into 9 mutant types under high positive  
36 selection pressure. Three mutant types (V367F, W436R, and D364Y) emerging in Wuhan, Shenzhen,  
37 Hong Kong, and France, displayed higher human ACE2 affinity, and probably higher infectivity. This  
38 is due to the enhanced structural stabilization of the RBD beta-sheet scaffold. High frequencies of  
39 RBD mutations were identified: V367F from five France and one Hong Kong mutants, 13 V483A and  
40 7 G476S mutants from the U.S.A. This suggested they originated as novel sub-lineages. The  
41 enhancement of the binding affinity of the mutant type (V367F) was further validated by the  
42 receptor-ligand binding ELISA assay. The molecular dynamics simulations also indicated that it  
43 would be difficult for bat SARS-like CoV to infect humans. However, the pangolin CoV is potentially  
44 infectious to humans. The analysis of critical RBD mutations provides further insights into the  
45 evolutionary history of SARS-CoV-2 under high selection pressure. An enhancement of the  
46 SARS-CoV-2 binding affinity to human ACE2 receptor reveals higher infectivity of the mutant  
47 strains.

48

## 49 **Importance**

50 A novel coronavirus SARS-CoV-2 has caused the pandemic of COVID-19. The origin of  
51 SARS-CoV-2 was associated with zoonotic infections. The spike protein receptor-binding domain  
52 (RBD) is identified as the critical determinant of viral tropism and infectivity. Thus, whether the  
53 mutations in the RBD of the circulating SARS-CoV-2 strains have altered the receptor binding  
54 affinity and caused these strains more infectious, should be paid more attentions to. Here, 32  
55 non-synonymous RBD mutants were identified and clustered into 9 mutant types under high positive

56 selection pressure, suggesting they originated as novel sub-lineages. Three mutant types displayed  
57 higher human ACE2 affinity, and probably higher infectivity, one of which (V367F) was validated  
58 by wet bench. The RBD mutation analysis provides insights into SARS-CoV-2 evolution. The  
59 emergence of RBD mutations with increased human ACE2 affinity reveals higher risk of severe  
60 morbidity and mortality during a sustained COVID-19 pandemic, particularly if no effective  
61 precautions are implemented.

62

63 **Keywords:** COVID-19; SARS-CoV-2; ACE2; RBD; mutations; affinity; infectivity; spike protein

64

## 65 **1. Introduction**

66 A novel coronavirus SARS-CoV-2 has caused the outbreaks of Coronavirus Disease 2019  
67 (COVID-19) globally since the first report in mid-December 2019 in Wuhan, China (1–4). As of  
68 April 14, 2020, SARS-CoV-2 has infected 1,844,863 people world-wide and caused 117,021 deaths  
69 (5) with the estimated fatality rate of 6.34%. This on-going pandemic of COVID-19 has become the  
70 most serious threat to public health in recent times.

71  
72 The origin of SARS-CoV-2 remains elusive. However, the initial cases were largely associated with  
73 the seafood market, which indicated this were potential zoonotic infections(2). Although bats and  
74 pangolins are most likely the reservoir hosts and the intermediate hosts in the wild, more evidences  
75 are in need to support the zoonotic infections and track the origin of this new coronavirus(6–8).

76  
77 Angiotensin-converting enzyme 2 (ACE2) is the cellular receptor of SARS-CoV-2 (9), which is the  
78 same as for SARS-CoV. The receptor-binding domain (RBD) of the subunit S1 directly interacts  
79 with ACE2, which provides for tight binding to the peptidase domain of ACE2. Therefore, RBD is  
80 the critical determinant of virus-receptor interaction and reflects viral host range, tropism and  
81 infectivity(6, 10–12). Although the RBD sequences of different SARS-CoV-2 strains circulating  
82 globally are conserved, mutations have appeared, which might account for differences in viral  
83 infectivity and contribute to its spread.

84  
85 Meanwhile, S protein participates in antigenic recognition expressed on its protein surface, likely to  
86 be immunogenic as for carrying both T-cell and B-cell epitopes. The potential antibody binding  
87 sites that have been identified indicates RBD has important B-cell epitopes. The main antibody  
88 binding sites substantially overlap with RBD, and the antibody binding to these sites is likely to  
89 block viral entry into cells(13, 14).

90  
91 To investigate whether these mutations in RBD have altered the receptor binding affinities and  
92 whether these strains may have been selected for higher infectivity, the binding dynamics between

93 the SARS-CoV-2 RBDs of the mutant strains to date and human ACE2 receptor were modelled and  
94 assessed.

95

## 96 **2. Results and discussion**

### 97 **2.1 SARS-CoV-2 RBD mutation mapping**

98 Among the 1609 SARS-CoV-2 strains with whole genome sequences available in the public  
99 databases, 32 strains contained non-synonymous amino acid mutations in the RBD (**Supplementary**  
100 **Table 1**). These strains were reported from multiple locations, including China, U.K., Finland,  
101 France, Belgium, U.S.A., and India (**Fig. 1**). Most mutants deviate from the original reported  
102 genome (SARS-CoV-2 Wuhan-Hu-1) by only one amino acid (**Supplementary Figure 1**). These 32  
103 mutations parse into 9 mutant types. Mutation V367F was found in six individual strains isolated  
104 from four patients: Three in France and one in Hong Kong. Similarly, high frequencies of RBD  
105 mutations were also identified the U.S.A: 13 V483A mutants and 7 G476S mutants (**Fig. 1**). This  
106 suggested that these mutant strains may have originated as novel sub-lineages.

107

### 108 **2.2 Nucleotide diversity indicates strong positive selective pressure on RBD**

109 Since RBD is the only domain to bind human ACE2 and initiate cell entry, it is believed that the  
110 RBD should be highly conserved. However, polymorphism and divergence analysis by DnaSP6  
111 (version 6.12.03) (15) showed that the RBD sequences were as diverse as the other regions of the S  
112 protein (**Fig. 2**). The peak signals for diversity distribute across the entire S protein, and the multiple  
113 peaks in the RBD also reached the  $P_i$  value of  $\sim 0.0008$ , similar to  $P_i$  values in the other regions.  
114 Therefore, we hypothesize that the RBD would be selected to maintain or even improve its binding  
115 affinity to human ACE2.

116

117 To test this hypothesis, we investigated the selective pressures of the S gene by calculating  
118 nonsynonymous/synonymous substitution rate ratios (dN/dS ratios) for various segments of the S  
119 gene in the 1609 SARS-CoV-2 strains. With respect to our hypothesis, the entire S gene exhibited a  
120 dN/dS of 4.1197, remarkably greater than 1, showing that the S gene is indeed under positive

121 selective pressure (Table 1). The RBD showed a similar dN/dS (3.3545) as the entire S protein,  
122 indicating that high selective pressure was also applied to this essential domain. Therefore, the  
123 functional relevance of these RBD mutations may be inferred.

124

### 125 **2.3 Three mutant types bind human ACE2 receptor with higher affinity**

126 To estimate the functional changes suggested by the RBD mutations, we performed molecular  
127 dynamics simulations for the prototype SARS-CoV-2 (Wuhan-Hu-1 strain) and the RBD mutants in  
128 order to assess their binding energy to human ACE2, which was performed using GROMACS 2019.  
129 The complex structure of the SARS-CoV-2 S-protein RBD domain and human ACE2 was obtained  
130 from National Microbiology Data Center (ID: NMDCS0000001) (PDB ID: 6LZG)  
131 (<https://www.rcsb.org/structure/6LZG>). Mutant amino acids of the SARS-CoV-2 RBD mutants were  
132 directly replaced in the model, and the bat/pangolin CoV RBD domain was modeled using  
133 SWISS-MODEL(16). Each simulation was performed at 10ns and each model was simulated in  
134 triplicates. All trajectories reached a plateau of RMSD after 2~5ns (Fig. 3A), indicating that their  
135 structures reached an equilibrium. All of the subsequent computations on thermodynamics were  
136 based on the 5~10ns trajectories. Three RBD mutant types (N354D and D364Y, V367F, W436R)  
137 exhibited significantly lowered  $\Delta G$ , suggesting a significantly increased affinity to human ACE2;  
138 the other mutants showed a similar  $\Delta G$  compared to the prototype (Fig. 3B). The  $\Delta G$  of these three  
139 mutant types were around -58 kJ/mol, approximately 25% lower than the prototype strain (-46.5  
140 kJ/mol, calculated from the experimentally measured  $K_D$ ) (Fig. 3B). Compared to the  $K_D = 14.7$  nM  
141 of the prototype RBD(17), the equilibrium dissociation constant ( $K_D$ ) of the three mutants are  
142 calculated as 0.12 nM, 0.11 nM, and 0.13 nM, respectively (Fig. 3C), which were two orders of  
143 magnitude lower than for the prototype strain, indicating a remarkably increased affinity to the  
144 human ACE2 receptor. In the only double amino acid mutant (N354D, D364Y), the N354D  
145 substitution decreased the affinity, while the D364Y provided an even higher affinity than the  
146 overall double mutations (Fig. 3B). This indicated that the D364Y is the major contributor of the  
147 enhanced affinity.

148

149 To validate the change of the binding affinity of the mutant S protein (V367F) experimentally, a  
150 receptor-ligand binding ELISA assay of the S proteins and the ACE2 was performed. **Fig. 3D**  
151 showed that the V367F mutant significantly lowered the ED50 concentration ( $ED_{50} = 0.8 \pm 0.04$   
152  $\mu\text{g/ml}$ ), as compared to the prototype ( $ED_{50} = 1.7 \pm 0.14$   $\mu\text{g/ml}$ ), demonstrating that the V367F  
153 mutant has higher affinity than the prototype. This result qualitatively validated our computational  
154 simulation.

155

156 In comparison, the bat CoV RBD (strain RaTG13, with the highest genome similarity) showed a  
157 much lower binding affinity ( $K_D = 1.17 \text{ mM}$ ;  $\Delta G = -17.4 \text{ kJ/mol}$ ) to human ACE2 than the pangolin  
158 CoV ( $K_D = 1.89 \mu\text{M}$ ;  $\Delta G = -33.9 \text{ kJ/mol}$ ). For comparison, the affinity of the pangolin CoV was slightly  
159 lower than the SARS-CoV-2 prototype strain ( $K_D = 14.7 \text{ nM}$ ;  $\Delta G = -46.5 \text{ kJ/mol}$ ) (**Fig. 3B, 3C**).

160

#### 161 **2.4 Structural basis for the increased affinity**

162 The 9 mutant types were divided into two groups: the “similar affinity” group (V341I, F342L,  
163 R408I, A435S, G476S, V483A), whose affinity is not significantly increased, and the “higher  
164 affinity” group (N354D D364Y, V367F, W436R), whose affinity is significantly increased. To  
165 explain the structural basis of the increased affinity, we investigated deeper into the dynamics of the  
166 residues of these structures. The binding surface of the RBD to ACE2 is largely in random coil  
167 conformation, which lacks structural rigidity. Therefore, a firm scaffold should be necessary to  
168 maintain this conformation of the interaction surface, and thus may facilitate the binding affinity.  
169 The beta-sheet structure scaffold, centered by residues 510-524 (**Fig. 4A**, marked as red), provides  
170 this rigidity. “Higher affinity” mutants (N354D D364Y, V367F, and W436R) showed a considerable  
171 decrease of the RMSF (Root Mean Square of Fluctuation) at this region, demonstrating a more rigid  
172 structure; this was not observed for the “similar affinity” mutants (**Fig. 4B**). Coincidentally, the  
173 substitutions that account for the affinity increase (D364Y, V367F, and W436R) are all located near  
174 this fragment. Indeed, residues 475-485, which is a random coil near the binding site, showed a  
175 remarkably higher RMSF for the “similar affinity” group mutants, in contrast to the “higher  
176 affinity” group mutants (**Fig. 4B**). Moreover, the “higher affinity” group exhibited a general

177 decreased  $\Delta G$  in the binding site region, but not the “similar affinity” group mutants (Fig. 4C). In  
178 addition, the D364Y and W436R themselves directly contributed to the  $\Delta G$  decrease. In contrast,  
179 the N354D mutation directly elevated the  $\Delta G$ , which coincides its consequence (Fig. 4B). The  
180 mutation W436R provides a positively charged Arg in the proximity of the complementing highly  
181 negative charged ACE2 surface. This potential electrostatic attraction may contribute to the higher  
182 affinity (Fig. 4D).

183

184

### 185 **3. Discussion**

186 Due to the lengthening pandemic and evolving nature of the SARS-CoV-2 virus globally, identifying  
187 changes in viral infectivity is crucial to containing the COVID-19 spread. Quarantine policies need to  
188 be adapted with respect to the changes in virus infectivity. This report provides computational insight  
189 into the functional outcome of mutations in RBD: RBD mutants under positive selection pressure,  
190 and several mutants acquired increased binding affinity to human ACE2 receptor, implying higher  
191 infectivity to humans (noted for one mutant with experimental validation).

192

193 It should be noted that the mutation V367F enhancing the affinity was found in six strains: One in  
194 Hong Kong and five in France. As RBD is conserved in SARS-CoV-2, the coincidence of six strains  
195 with the same mutation across the geographic distance indicates that this mutant may have evolved  
196 to be more robust and that these strains originated as a novel sub-lineage, given the close isolation  
197 dates (January 22 and 23, respectively). Combined with the epidemiological data, mutation  
198 surveillance is of critical importance as it can reveal more exact transmission routes of the epidemic  
199 and provide early warning for additional outbreaks. Emergence of SARS-CoV-2 strains in Hong  
200 Kong, France, and other countries with RBD mutations providing higher binding affinity to human  
201 ACE2 receptor suggests a higher risk of more severe morbidity and mortality  
202 during a sustained pandemic of COVID-19, particularly if no effective precautions  
203 are implemented.

204



205 Our analysis of molecular dynamics simulation indicates the remarkable enhancement of the  
206 affinity efficiency of mutant S protein. Compared to the prototype strain Wuhan-Hu-1, the  $\Delta G$  of  
207 mutants decreased  $\sim 25\%$ . Mutants bind ACE2 more stably due to the enhancement of the base  
208 rigidity. Potential and recent animal-to-human transmission events of SARS-CoV-2, may explain  
209 the strong positive selection and enhancement of the affinity during the pandemic. The viruses have  
210 been adapting to transmission and replication in humans; mutation or recombination events in RBD  
211 may boost the binding affinity and cause the basic reproduction number ( $R_0$ ) to climb in theory, i.e.,  
212 the human to human transmission more easily.

213

214 The origination of the virus is a constant hot topic since the virus outbreak. Due to the high  
215 homology of the bat SARS-like CoV genome and pangolin CoV RBD to the SARS-CoV-2, these  
216 wild animals were thought to initiate the infection in human. Our results provided more clues on  
217 this postulation. In our study, the binding energy of the bat SARS-like CoV RBD suggests it is too  
218 high to bind human ACE2 effectively ( $K_D$  in millimolar range). In contrast, the pangolin CoV  
219 showed a  $K_D$  of binding to human ACE2 at the micromolar range, just  $\sim 6x$  higher than that of  
220 human SARS virus ( $K_D = 0.326\mu M$ )(17) (Fig. 3), indicating that the pangolin CoV has the potential  
221 to infect human in unprotected close contact. Alignment of the genomic sequences of SARS-CoV-2  
222 and pangolin CoV viruses indicated the evidence for recombination events in RBD domain between  
223 pangolin and bat viruses. The pangolin CoV has been detected among the smuggled Malayan  
224 pangolins in multiple provinces in China(7, 8), suggesting a risk of zoonotic infection from wild  
225 animals to human constantly and widely.

226

227 The S protein is also important for antigen recognition. In this survey of 1609 strains, 32 had amino  
228 acid mutations in the RBD. High frequencies of RBD mutations were identified: V367F from five  
229 France and one Hong Kong mutants, 13 V483A and 7 G476S mutants from the U.S.A. Since the  
230 RBD contains important antigenic epitopes, frequent mutations in RBD, especially those which  
231 change the amino acid properties, may weaken the binding affinity of the antibody raised against  
232 the prototype strain. This may lead to decreased vaccine efficacy and should be further validated.

233

234 In summary, we have identified 32 RBD mutant strains clustering into 9 mutant types under high  
235 positive selection pressure. This suggested that they originated as novel sub-lineages. Three mutant  
236 types emerging in Asia and Europe displays enhanced structural stability of the spike protein along  
237 with higher binding affinities to human ACE2 receptor, which indicates that these mutants may  
238 have acquired increased infectivity to humans.

239

240

## 241 **4. Methods and materials**

### 242 **4.1 Genome sequence dataset in this study**

243 Full-length protein sequences of S protein RBD were downloaded from the NCBI GenBank  
244 Database, China 2019 Novel Coronavirus Resource (<https://bigd.big.ac.cn/ncov>) and GISAID  
245 EpiFluTM Database (<http://www.GISAID.org>). 1609 SARS-CoV-2 full-genome sequences were  
246 downloaded and the sequences with amino acid mutations in S protein and RBD region were  
247 screened. The genome sequences with amino acid mutations in S protein and the RBD were  
248 analyzed in this study ([Supplementary Table 1](#)).

249

### 250 **4.2 Sequences alignment and polymorphism analyses**

251 Alignment of S protein sequences from different sources and comparison of ACE2 proteins among  
252 different species were accomplished by MAFFT version 7 online server with default parameter  
253 (<https://mafft.cbrc.jp/alignmeloaddnt/server/>) and Bioedit(18, 19). Polymorphism and divergence  
254 were analyzed by DnaSP6 (version 6.12.03) (15). Analyses were conducted using the Nei-Gojobori  
255 model(20). All positions containing gaps and missing data were eliminated. Evolutionary analyses  
256 were conducted in Mega X (version 10.0.2) (21).

257

### 258 **4.3 Molecular dynamics (MD) simulation**

259 The complex structure of the SARS-CoV-2 S-protein RBD domain and human ACE2 was obtained  
260 from National Microbiology Data Center (ID: NMDCS0000001) (PDB ID: 6LZG). Mutant amino  
261 acids of the SARS-CoV-2 RBD mutants were directly replaced in the model, and the bat/pangolin  
262 CoV RBD domain was modelled using SWISS-MODEL(16). Molecular dynamics simulation was  
263 performed using GROMACS 2019 with the following options and parameters: explicit solvent  
264 model, system temperature 37°C, OPLS/AA all-atoms force field, LINCS restraints. With 2fs steps,  
265 each simulation was performed at 10ns, and each model was simulated 3 times to generate 3  
266 independent trajectory replications. Binding free energy ( $\Delta G$ ) was calculated using MM-PBSA  
267 method (software downloaded from GitHub: <https://github.com/Jerkwin/gmxtool>) with the  
268 trajectories after structural equilibrium assessed using RMSD (Root Mean Square Deviation)(22).

269 The formula  $\Delta G = RT \ln K_D$  was used to calculate between equilibrium dissociation constant ( $K_D$ )  
270 and  $\Delta G$ . The estimated  $\Delta G$  of the RBD mutants were normalized using the  $\Delta G$  of the prototype  
271 strain which was derived from experimental data(23).

272

#### 273 **4.4 Recombinant S protein mutant expression**

274 The SARS-CoV-2 prototype S gene was cloned into pNPM5 vector (Novoprotein, NJ, USA), fused  
275 with C-terminal His<sub>6</sub>-tag. V367F mutation was introduced using site-directed mutagenesis  
276 according to the nucleotide sequence of the actual isolate. These two constructs were transfected  
277 into HEK293 cells using polyethyleneimine, respectively. Since the S protein includes the signal  
278 peptide in its N-terminal 14 amino acids, the S protein was secreted into the medium. The expressed  
279 proteins were purified from filtered cell supernatants by Ni-NTA column. The eluted protein  
280 solution was dialyzed in buffer PBS (pH7.4) for downstream assays.

281

#### 282 **4.5 Ligand-receptor binding ELISA assay**

283 The human ACE2 was immobilized in the microtiter plate at 5  $\mu\text{g/ml}$  (100 $\mu\text{l/well}$ ). The S proteins  
284 (prototype and V367F, respectively) was added as ligand at different concentrations, from 0.03  
285  $\mu\text{g/ml}$  to 10  $\mu\text{g/ml}$ , and then incubated for 2 hours at 37°C to allow receptor-ligand interaction. The  
286 ligand was then washed 3 times. 100 $\mu\text{l}$  of HRP anti-His Tag Antibody (BioLegend, USA) (diluted  
287 1:20000) was added to each well for 1 hour. After 3 times washing, the signal was visualized using  
288 TMB solution (Sigma-Aldrich, USA). OD450 was recorded using microtiter plate reader.

289

290

291 **Acknowledgments**

292 We gratefully acknowledge the authors, originating and submitting laboratories of the sequences  
293 from GISAID's EpiFlu™ Database on which this research is based. All submitters of data may be  
294 contacted directly via [www.gisaid.org](http://www.gisaid.org).

295  
296 Data available in Supplementary material.

297  
298 **Funding statement:**

299 This work was supported by grants from the National Key Research and Development Program of  
300 China (2017YFA0505001/2018YFC0910200/2018YFE0204503), the National Natural Science  
301 Foundation of China (81730061), the Guangdong Key Research and Development Program  
302 (2019B020226001), the Natural Science Foundation of Guangdong Province (2018B030312010),  
303 and the Guangzhou Healthcare Collaborative Innovation Major Project (201803040004 and  
304 201803040007).

305  
306 **Conflict of interest**

307 The authors declare that they have no conflicts of interest.

308  
309  
310 **Reference**

- 311 1. Zhu N, Zhang D, Wang W, Li X, Yang B, Song J, Zhao X, Huang B, Shi W, Lu R, Niu P,  
312 Zhan F, Ma X, Wang D, Xu W, Wu G, Gao GF, Tan W. 2020. A Novel Coronavirus from  
313 Patients with Pneumonia in China, 2019. *N Engl J Med* 727–733.
- 314 2. Li Q, Guan X, Wu P, Wang X, Zhou L, Tong Y, Ren R, Leung KSM, Lau EHY, Wong JY,  
315 Xing X, Xiang N, Wu Y, Li C, Chen Q, Li D, Liu T, Zhao J, Liu M, Tu W, Chen C, Jin L,  
316 Yang R, Wang Q, Zhou S, Wang R, Liu H, Luo Y, Liu Y, Shao G, Li H, Tao Z, Yang Y,  
317 Deng Z, Liu B, Ma Z, Zhang Y, Shi G, Lam TTY, Wu JT, Gao GF, Cowling BJ, Yang B,  
318 Leung GM, Feng Z. 2020. Early Transmission Dynamics in Wuhan, China, of Novel

- 319 Coronavirus–Infected Pneumonia. *N Engl J Med* 1–9.
- 320 3. Wang D, Hu B, Hu C, Zhu F, Liu X, Zhang J, Wang B, Xiang H, Cheng Z, Xiong Y, Zhao Y,  
321 Li Y, Wang X, Peng Z. 2020. Clinical Characteristics of 138 Hospitalized Patients with 2019  
322 Novel Coronavirus-Infected Pneumonia in Wuhan, China. *JAMA - J Am Med Assoc* 1–9.
- 323 4. Chan JFW, Yuan S, Kok KH, To KKW, Chu H, Yang J, Xing F, Liu J, Yip CCY, Poon RWS,  
324 Tsoi HW, Lo SKF, Chan KH, Poon VKM, Chan WM, Ip JD, Cai JP, Cheng VCC, Chen H,  
325 Hui CKM, Yuen KY. 2020. A familial cluster of pneumonia associated with the 2019 novel  
326 coronavirus indicating person-to-person transmission: a study of a family cluster. *Lancet*  
327 395:514–523.
- 328 5. World Health Organization. 2020. Coronavirus disease (COVID-2019) situation reports,  
329 2020-04-14.  
330 <https://www.who.int/emergencies/diseases/novel-coronavirus-2019/situation-reports/>.
- 331 6. Zhou P, Yang X-L, Wang X-G, Hu B, Zhang L, Zhang W, Si H-R, Zhu Y, Li B, Huang C-L,  
332 Chen H-D, Chen J, Luo Y, Guo H, Jiang R-D, Liu M-Q, Chen Y, Shen X-R, Wang X, Zheng  
333 X-S, Zhao K, Chen Q-J, Deng F, Liu L-L, Yan B, Zhan F-X, Wang Y-Y, Xiao G-F, Shi Z-L.  
334 2020. A pneumonia outbreak associated with a new coronavirus of probable bat origin.  
335 *Nature*.
- 336 7. Lam TT-Y, Shum MH-H, Zhu H-C, Tong Y-G, Ni X-B, Liao Y-S, Wei W, Cheung WY-M,  
337 Li W-J, Li L-F, Leung GM, Holmes EC, Hu Y-L, Guan Y. 2020. Identifying SARS-CoV-2  
338 related coronaviruses in Malayan pangolins. *Nature*.
- 339 8. Xiao K, Zhai J, Feng Y, Zhou N, Zhang X, Zou J-J, Li N, Guo Y, Li X, Shen X, Zhang Z,  
340 Shu F, Huang W, Li Y, Zhang Z, Chen R-A, Wu Y-J, Peng S-M, Huang M, Xie W-J, Cai  
341 Q-H, Hou F-H, Liu Y, Chen W, Xiao L, Shen Y. 2020. Isolation and Characterization of  
342 2019-nCoV-like Coronavirus from Malayan Pangolins. *bioRxiv* 2020.02.17.951335.
- 343 9. Hoffmann M, Kleine-Weber H, Schroeder S, Krüger N, Herrler T, Erichsen S, Schiergens TS,  
344 Herrler G, Wu N-H, Nitsche A, Müller MA, Drosten C, Pöhlmann S. 2020. SARS-CoV-2  
345 Cell Entry Depends on ACE2 and TMPRSS2 and Is Blocked by a Clinically Proven Protease  
346 Inhibitor. *Cell* S0092-8674(20)30229–4.

- 347 10. Letko M, Marzi A, Munster V. 2020. Functional assessment of cell entry and receptor usage  
348 for SARS-CoV-2 and other lineage B betacoronaviruses. *Nat Microbiol* 1–8.
- 349 11. Chen Y, Guo Y, Pan Y, Zhao ZJ. 2020. Structure analysis of the receptor binding of  
350 2019-nCoV. *Biochem Biophys Res Commun* 2:0–5.
- 351 12. Wan Y, Shang J, Graham R, Baric RS, Li F. 2020. Receptor recognition by novel  
352 coronavirus from Wuhan: An analysis based on decade-long structural studies of SARS. *J*  
353 *Virology*.
- 354 13. Fast E, Altman RB, Chen B. 2020. Potential T-cell and B-cell Epitopes of 2019-nCoV.  
355 bioRxiv 2020.02.19.955484.
- 356 14. Ahmed SF, Quadeer AA, McKay MR. 2020. Preliminary identification of potential vaccine  
357 targets for 2019-nCoV based on SARS-CoV immunological studies. *Viruses*  
358 2020.02.03.933226.
- 359 15. Rozas J, Ferrer-Mata A, Sanchez-DelBarrio JC, Guirao-Rico S, Librado P, Ramos-Onsins SE,  
360 Sanchez-Gracia A. 2017. DnaSP 6: DNA sequence polymorphism analysis of large data sets.  
361 *Mol Biol Evol* 34:3299–3302.
- 362 16. Waterhouse A, Bertoni M, Bienert S, Studer G, Tauriello G, Gumienny R, Heer FT, De Beer  
363 TAP, Rempfer C, Bordoli L, Lepore R, Schwede T. 2018. SWISS-MODEL: Homology  
364 modelling of protein structures and complexes. *Nucleic Acids Res* 46:W296–W303.
- 365 17. Wrapp D, Wang N, Corbett KS, Goldsmith JA, Hsieh C-L, Abiona O, Graham BS, McLellan  
366 JS. 2020. Cryo-EM structure of the 2019-nCoV spike in the prefusion conformation. *Science*  
367 (80- ) 367:1260 LP – 1263.
- 368 18. Katoh K, Rozewicki J, Yamada KD. 2018. MAFFT online service: Multiple sequence  
369 alignment, interactive sequence choice and visualization. *Brief Bioinform* 20:1160–1166.
- 370 19. Kuraku S, Zmasek CM, Nishimura O, Katoh K. 2013. aLeaves facilitates on-demand  
371 exploration of metazoan gene family trees on MAFFT sequence alignment server with  
372 enhanced interactivity. *Nucleic Acids Res* 41:22–28.
- 373 20. Nei M, Gojoborit T. 1986. Simple methods for estimating the numbers of synonymous and  
374 nonsynonymous nucleotide substitutions. *Mol Biol Evol* 3:418–426.

- 375 21. Kumar S, Stecher G, Li M, Knyaz C, Tamura K. 2018. MEGA X: Molecular evolutionary  
376 genetics analysis across computing platforms. *Mol Biol Evol* 35:1547–1549.
- 377 22. Homeyer N, Gohlke H. 2012. Free energy calculations by the Molecular Mechanics  
378 Poisson-Boltzmann Surface Area method. *Mol Inform* 31:114–122.
- 379 23. Rifai EA, Van Dijk M, Vermeulen NPE, Yanuar A, Geerke DP. 2019. A Comparative Linear  
380 Interaction Energy and MM/PBSA Study on SIRT1-Ligand Binding Free Energy Calculation.  
381 *J Chem Inf Model* 59:4018–4033.

382



383 **Figure**

384 **Fig. 1: Distribution of the SARS-CoV-2 strains mutant in the RBD of the S protein.** The  
385 geographic distribution of the 32 RBD mutant strains clustering into 9 mutant types is displayed.  
386 The strains with names highlighted in red are mutants with the enhanced binding affinity. The  
387 strains with names noted in yellow are mutants with similar binding affinities.

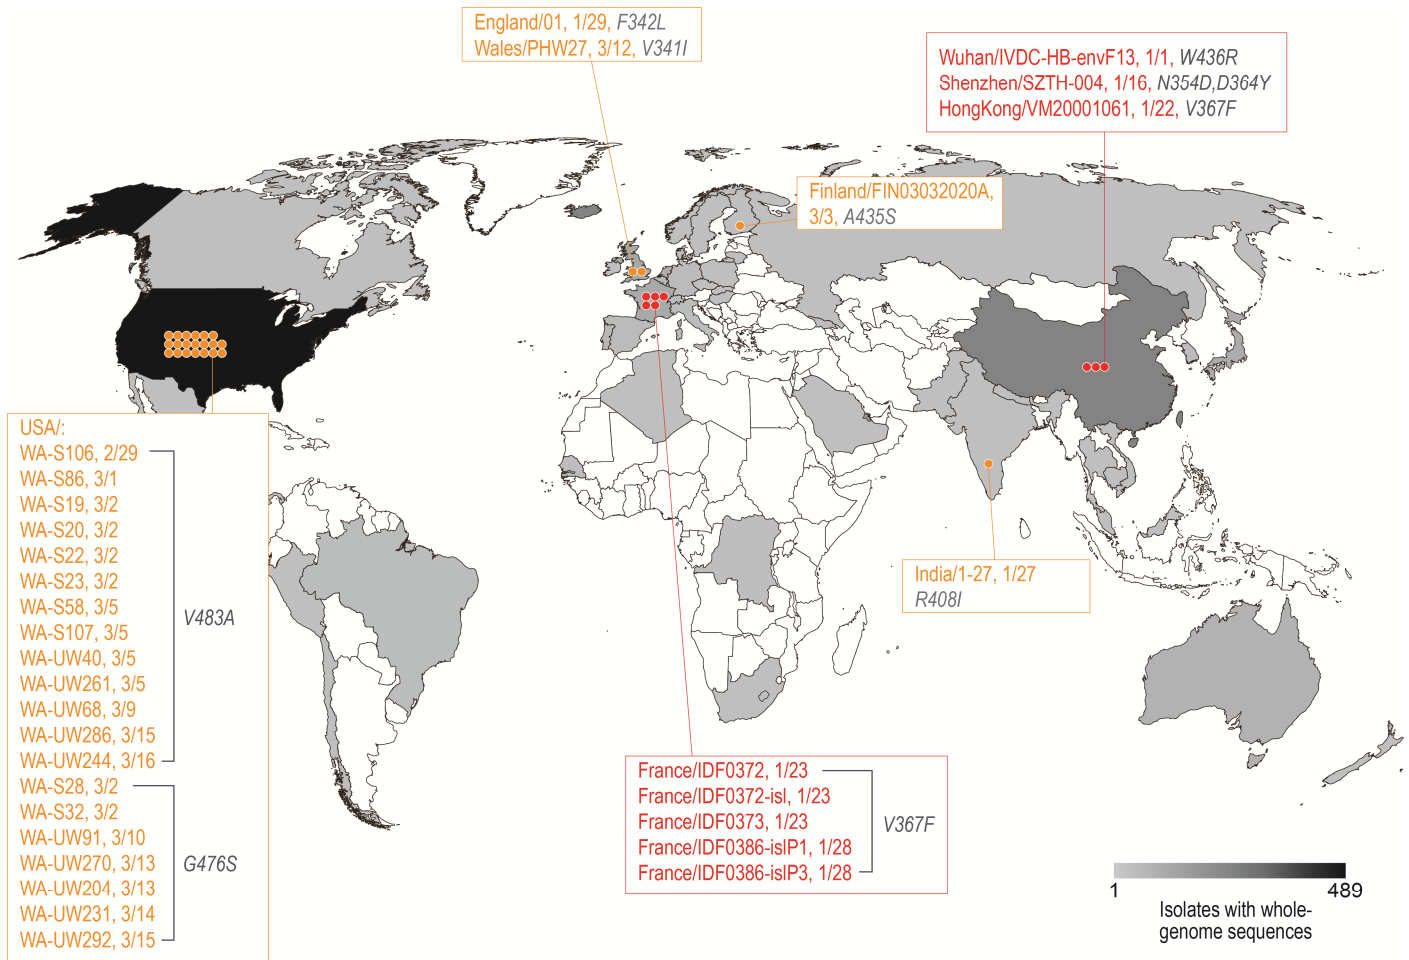

388

389

390 **Fig. 2: Polymorphism and divergence graph of SARS-CoV-2 S gene.** Polymorphism and  
391 divergence were analyzed by DnaSP6 (version 6.12.03). Analyses were conducted using the  
392 Nei-Gojobori model. All positions containing gaps and missing data were eliminated. Structural  
393 domains are annotated. The Pi values are calculated with window size: 20 nt, step size: 5.  
394

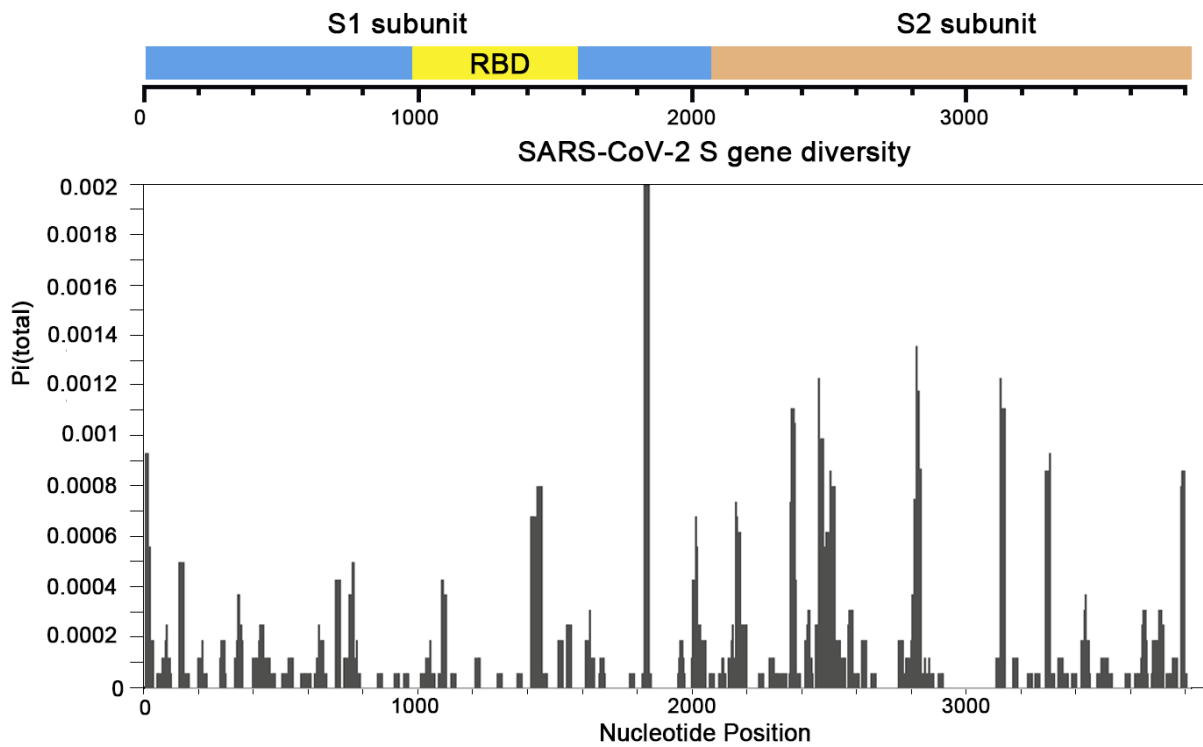

395  
396  
397

398 **Fig. 3: Binding free energy calculated for the SARS-CoV-2 S-RBD to human ACE2. (A)** RMSD  
399 of typical MD trajectories of the SARS-CoV-2 prototype and the mutant strains. **(B)** Comparison of  
400 the binding free energy ( $\Delta G$ ) of the RBDs and the human ACE2. Note, the  $\Delta G$  is inversely  
401 proportional to the binding affinity. Data are presented as mean $\pm$ SD. *P*-values were calculated using  
402 single-tailed student t-test. The *P*-values are shown for those with  $P < 0.05$ . The  $\Delta G$  calculated from  
403 experimental  $K_D$  values of SARS and SARS-CoV-2 prototype are marked in dotted and dashed  
404 lines, respectively. **(C)** Comparison of the equilibrium dissociation constants ( $K_D$ ) as calculated  
405 with the  $\Delta G$ . **(D)** Comparison of the binding affinity of prototype S protein and V367F mutant to  
406 human ACE2 by ligand-receptor binding ELISA assay.

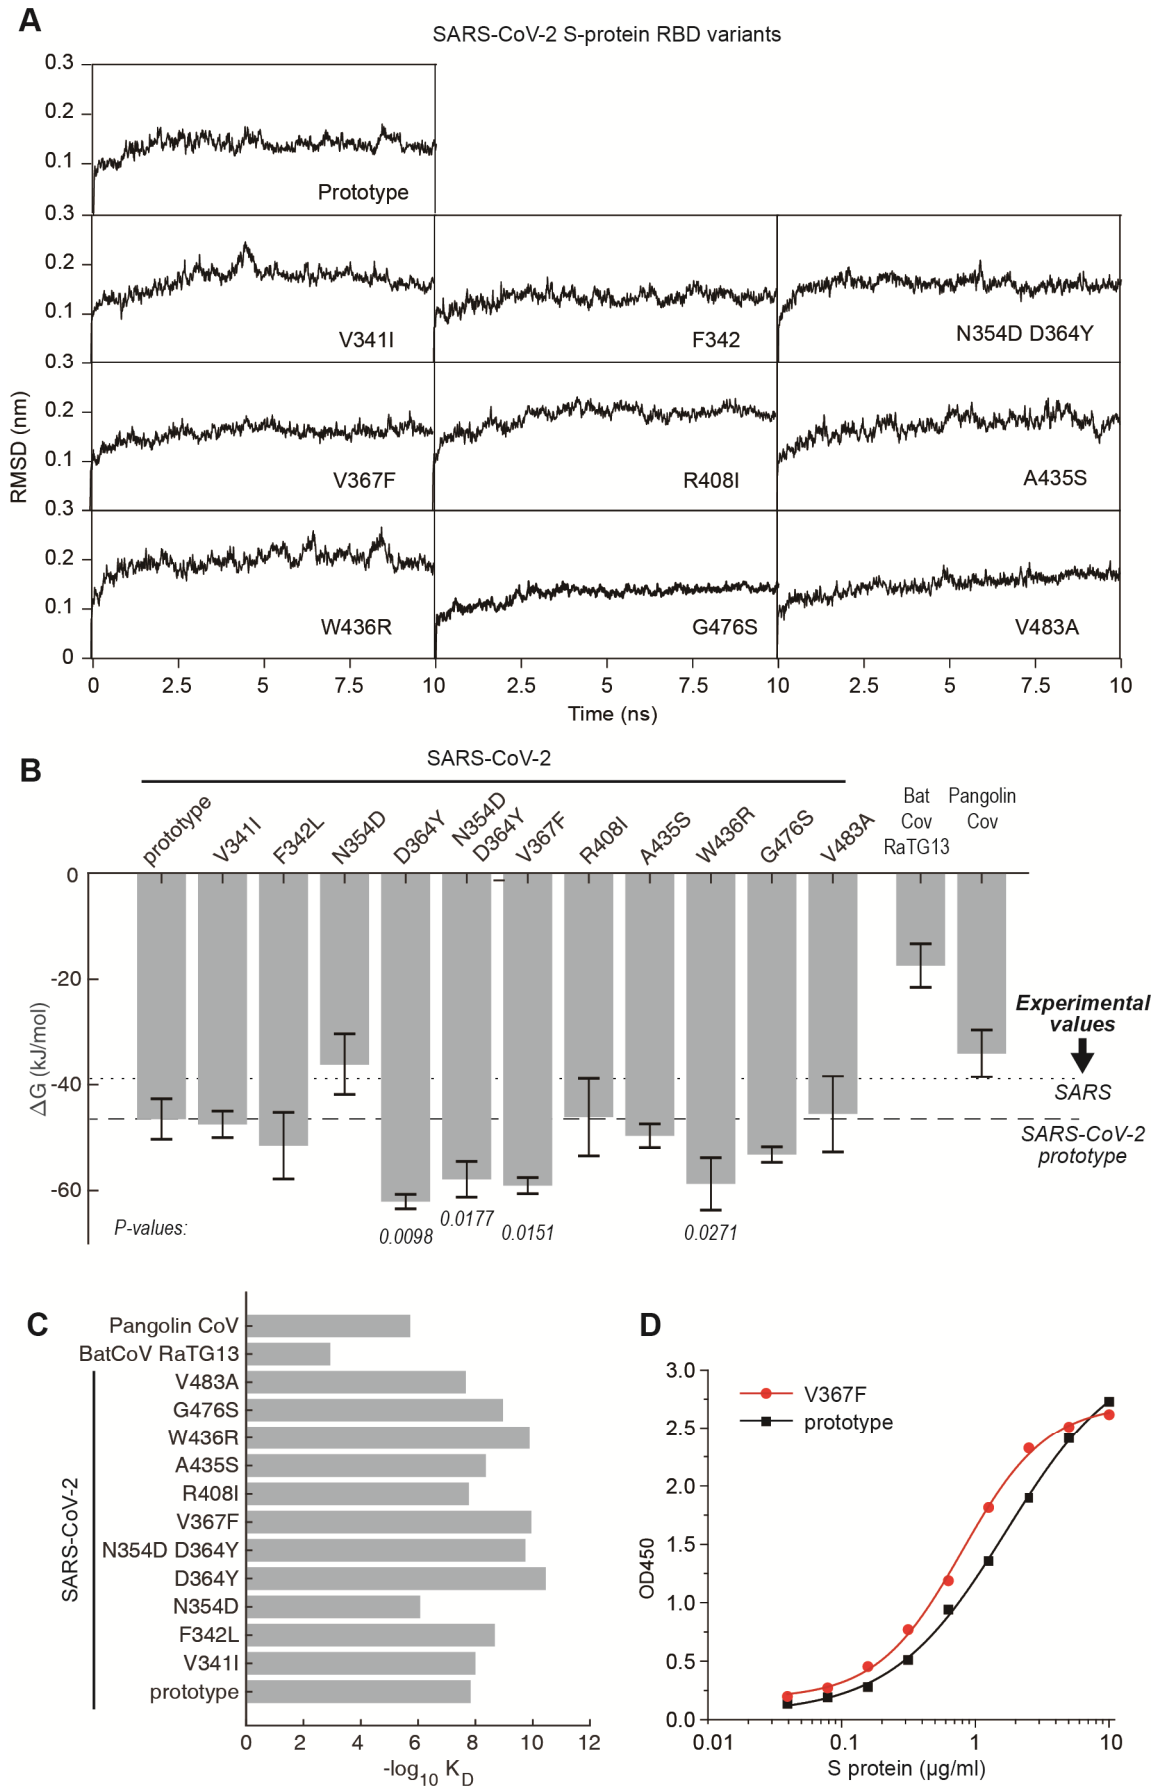

408 **Fig. 4: Structural analysis of RBD mutants and the effects on their binding affinity. (A)** Spatial  
409 location of the mutant amino acids and the fragment 510-524. **(B)** RMSF of the nine mutants were  
410 compared to that of the prototype. Red arrows denote the fragment of residues 510-524. Black  
411 arrows denote the fragment of residues 475-485. **(C)** Contribution of each amino acid to the binding  
412 free energy. Red bars denote the binding site. **(D)** View of the interaction surface of ACE2, with  
413 charge density noted. The arginine of the W436R mutant is in the proximity of the negatively  
414 charged amino acids. The electrostatic surface charges of the ACE2 are calculated using Pymol,  
415 with the charge unit  $K_bT/e_c$ , as noted in the Pymol manual.

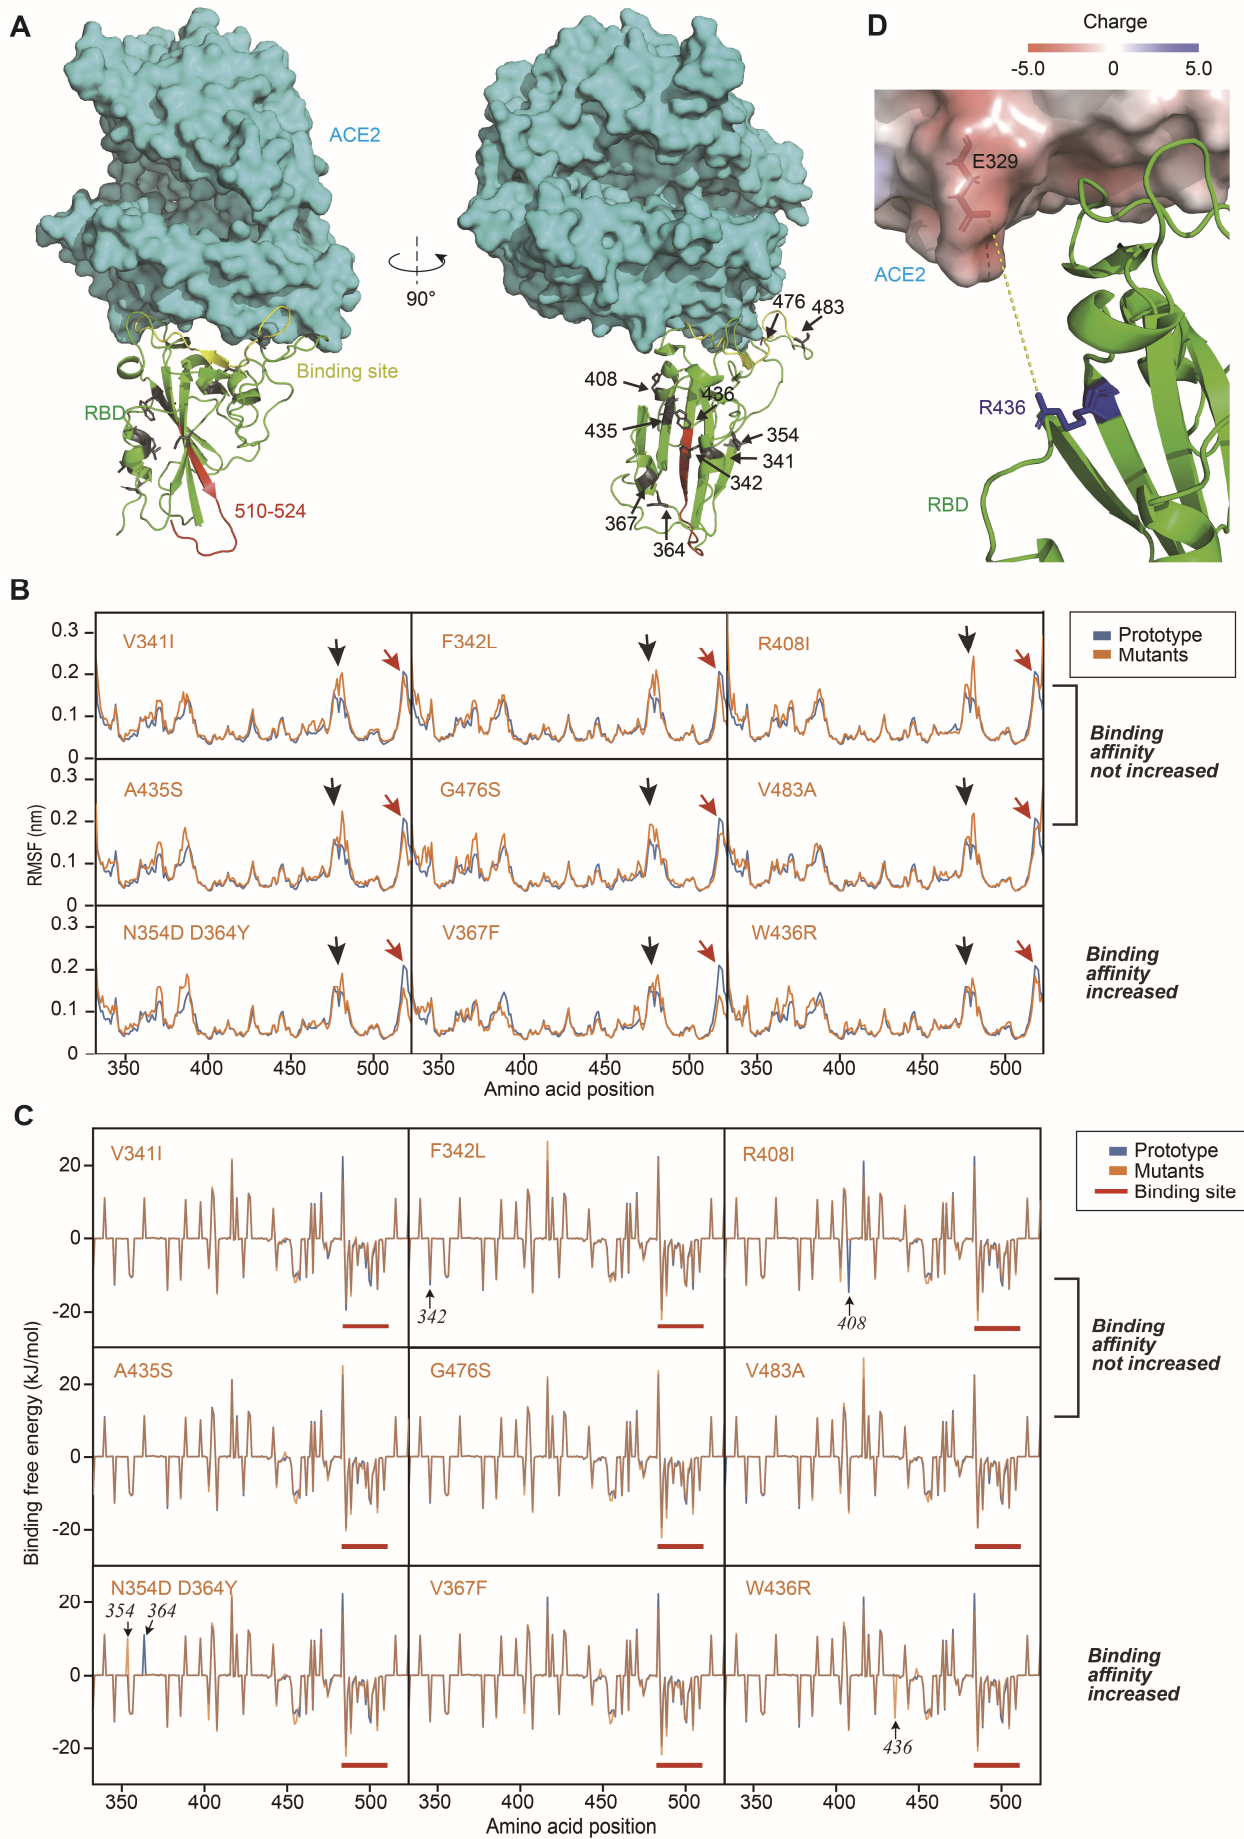

417 **Table 1: Nucleotide substitution rates and selection pressures for S gene.**

418 The numbers of nonsynonymous and synonymous differences per sequence from averaging over all  
419 sequence pairs are shown. Analyses were conducted using the Nei-Gojobori model. The analysis  
420 involved 1609 SARS-CoV-2 S gene sequences. All positions containing gaps and missing data were  
421 discarded.

422

---

| Gene   | Length(bp) | Mean Non-synonymous Substitutions/site | Mean Synonymous Substitutions/site | dN/dS   |
|--------|------------|----------------------------------------|------------------------------------|---------|
| S      | 3822       | 0.7726                                 | 0.1875                             | 4.1197  |
| S1     | 2043       | 0.6207                                 | 0.0571                             | 10.8636 |
| S1-RBD | 585        | 0.0458                                 | 0.0137                             | 3.3545  |
| S2     | 1779       | 0.1519                                 | 0.1304                             | 1.1646  |

---

423

424 **Supplementary data**

425 **Supplementary Table 1: Meta data of the strains with non-synonymous mutations in the RBD of spike glycoprotein.**

| GISAID Virus name                     | RBD mutation    | Collection date | Location                          | Gender  | Age     | Specimen source                                  | Additional information | Accession ID   |
|---------------------------------------|-----------------|-----------------|-----------------------------------|---------|---------|--------------------------------------------------|------------------------|----------------|
| hCoV-19/Wuhan/IVDC-HB-envF<br>13/2020 | W436R           | 2020/1/1        | Asia/China/Hubei/Wuhan            | Unknown | Unknown | Environment                                      | HuananSeafoodMarket    | EPI_ISL_408511 |
| hCoV-19/Shenzhen/SZTH-004/20<br>20    | N354D,<br>D364Y | 2020/1/16       | Asia/China/Guandong/Shenzhen      | Male    | 63      | Alveolarlavage<br>fluid                          |                        | EPI_ISL_406595 |
| hCoV-19/HongKong/VM2000106<br>1/2020  | V367F           | 2020/1/22       | Asia/HongKong                     | Male    | 39      | Nasopharyngealaspirate&Throatswab                |                        | EPI_ISL_412028 |
| hCoV-19/France/IDF0372/2020           | V367F           | 2020/1/23       | Europe/France/Ile-de-France/Paris | Female  | 31      | Oro-Pharyngealswab                               |                        | EPI_ISL_406596 |
| hCoV-19/France/IDF0372-is1/2020       | V367F           | 2020/1/23       | Europe/France/Ile-de-France/Paris | Female  | 31      | Oro-Pharyngealswab                               |                        | EPI_ISL_410720 |
| hCoV-19/France/IDF0373/2020           | V367F           | 2020/1/23       | Europe/France/Ile-de-France/Paris | Male    | 32      | Orao-pharungealswab                              |                        | EPI_ISL_406597 |
| hCoV-19/India/1-27/2020               | R408I           | 2020/1/27       | Asia/India/Kerala                 | Female  | 20      | Throatswab                                       | TravelhistorytoChina   | EPI_ISL_413522 |
| hCoV-19/France/IDF0386-is1P1/2020     | V367F           | 2020/1/28       | Europe/France/Ile-de-France/Paris | Female  | 30      | Naso-pharyngealrelatedtoEPI_ISL_406596<br>alswab |                        | EPI_ISL_411219 |
| hCoV-19/France/IDF0386-is1P3/2020     | V367F           | 2020/1/28       | Europe/France/Ile-de-France/Paris | Female  | 30      | Naso-pharyngealrelatedtoEPI_ISL_406596<br>alswab |                        | EPI_ISL_411220 |
| hCoV-19/England/01/2020               | F342L           | 2020/1/29       | Europe/England                    | Female  | 50      | swab                                             | Englandclusterpatient1 | EPI_ISL_407071 |
| hCoV-19/USA/WA-S106/2020              | V483A           | 2020/2/29       | NorthAmerica/USA/Washington       | Unknown | Unknown |                                                  |                        | EPI_ISL_417159 |
| hCoV-19/USA/WA-S86/2020               | V483A           | 2020/3/1        | NorthAmerica/USA/Washington       | Unknown | Unknown |                                                  |                        | EPI_ISL_417139 |
| hCoV-19/USA/WA-S19/2020               | V483A           | 2020/3/2        | NorthAmerica/USA/Washington       | Unknown | Unknown |                                                  |                        | EPI_ISL_417072 |



|                                       |       |           |                             |         |         |                |
|---------------------------------------|-------|-----------|-----------------------------|---------|---------|----------------|
| hCoV-19/USA/WA-S20/2020               | V483A | 2020/3/2  | NorthAmerica/USA/Washington | Unknown | Unknown | EPI_ISL_417073 |
| hCoV-19/USA/WA-S22/2020               | V483A | 2020/3/2  | NorthAmerica/USA/Washington | Unknown | Unknown | EPI_ISL_417075 |
| hCoV-19/USA/WA-S23/2020               | V483A | 2020/3/2  | NorthAmerica/USA/Washington | Unknown | Unknown | EPI_ISL_417076 |
| hCoV-19/USA/WA-S28/2020               | G476S | 2020/3/2  | NorthAmerica/USA/Washington | Unknown | Unknown | EPI_ISL_417081 |
| hCoV-19/USA/WA-S32/2020               | G476S | 2020/3/2  | NorthAmerica/USA/Washington | Unknown | Unknown | EPI_ISL_417085 |
| hCoV-19/Finland/FIN03032020A/<br>2020 | A435S | 2020/3/3  | Europe/Finland/Helsinki     | Male    | 40      | EPI_ISL_413602 |
| hCoV-19/USA/WA-S58/2020               | V483A | 2020/3/5  | NorthAmerica/USA/Washington | Unknown | Unknown | EPI_ISL_417111 |
| hCoV-19/USA/WA-S107/2020              | V483A | 2020/3/5  | NorthAmerica/USA/Washington | Unknown | Unknown | EPI_ISL_417160 |
| hCoV-19/USA/WA-UW40/2020              | V483A | 2020/3/5  | NorthAmerica/USA/Washington | Unknown | Unknown | EPI_ISL_415605 |
| hCoV-19/USA/WA-UW261/2020             | V483A | 2020/3/5  | NorthAmerica/USA/Washington | Unknown | Unknown | EPI_ISL_418046 |
| hCoV-19/USA/WA-UW68/2020              | V483A | 2020/3/9  | NorthAmerica/USA/Washington | Unknown | Unknown | EPI_ISL_415596 |
| hCoV-19/USA/WA-UW91/2020              | G476S | 2020/3/10 | NorthAmerica/USA/Washington | Unknown | Unknown | EPI_ISL_416447 |
| hCoV-19/Wales/PHW27/2020              | V341I | 2020/3/12 | Europe/UnitedKingdom/Wales  | Male    | 49      | EPI_ISL_415655 |
| hCoV-19/USA/WA-UW270/2020             | G476S | 2020/3/13 | NorthAmerica/USA/Washington | Unknown | Unknown | EPI_ISL_418055 |
| hCoV-19/USA/WA-UW204/2020             | G476S | 2020/3/13 | NorthAmerica/USA/Washington | Unknown | Unknown | EPI_ISL_417353 |
| hCoV-19/USA/WA-UW231/2020             | G476S | 2020/3/14 | NorthAmerica/USA/Washington | Unknown | Unknown | EPI_ISL_417380 |
| hCoV-19/USA/WA-UW286/2020             | V483A | 2020/3/15 | NorthAmerica/USA/Washington | Unknown | Unknown | EPI_ISL_418071 |
| hCoV-19/USA/WA-UW292/2020             | G476S | 2020/3/15 | NorthAmerica/USA/Washington | Unknown | Unknown | EPI_ISL_418077 |
| hCoV-19/USA/WA-UW244/2020             | V483A | 2020/3/16 | NorthAmerica/USA/Washington | Unknown | Unknown | EPI_ISL_418029 |

427 **Supplementary Figure 1: Multiple alignments of the RBD amino acid sequences. SARS-CoV-2**  
428 **Wuhan-Hu-1, the first reported genome, is used as reference. A bat and a pangolin SARS-like**  
429 **coronavirus are also included. Amino acid substitutions are marked. Dots indicate identical**  
430 **amino acids.**  
431

| 432 | 330                                                                                               | 340        | 350      | 360         | 370            |                                 |
|-----|---------------------------------------------------------------------------------------------------|------------|----------|-------------|----------------|---------------------------------|
| 433 | . . . .   . . . .   . . . .   . . . .   . . . .   . . . .   . . . .   . . . .   . . . .   . . . . |            |          |             |                |                                 |
| 434 | PNITNLC                                                                                           | PFGEVFNATR | FASVYAWN | RKRISNCVADY | SVLYNSASFSTFKC | SARS-CoV-2 Wuhan-Hu-1           |
| 435 | .....                                                                                             | .....      | .....    | .....       | F.....         | SARS-CoV-2 France/IDF0372       |
| 436 | .....                                                                                             | .....      | .....    | .....       | F.....         | SARS-CoV-2 France/IDF0373       |
| 437 | .....                                                                                             | .....      | .....    | .....       | F.....         | SARS-CoV-2 France/IDF0372-isl   |
| 438 | .....                                                                                             | .....      | .....    | .....       | F.....         | SARS-CoV-2 France/IDF0386-islP1 |
| 439 | .....                                                                                             | .....      | .....    | .....       | F.....         | SARS-CoV-2 France/IDF0386-islP3 |
| 440 | .....                                                                                             | .....      | .....    | .....       | F.....         | SARS-CoV-2 Hong Kong/VM20001061 |
| 441 | .....                                                                                             | .....      | .....    | .....       | .....          | SARS-CoV-2 Wuhan/IVDC-HB-envF13 |
| 442 | .....                                                                                             | .....      | D.....   | .....       | Y.....         | SARS-CoV-2 Shenzhen/SZTH-004    |
| 443 | .....                                                                                             | .....      | .....    | .....       | .....          | SARS-CoV-2 Finland/FIN03032020A |
| 444 | .....                                                                                             | I.....     | .....    | .....       | .....          | SARS-CoV-2 Wales/PHW27          |
| 445 | .....                                                                                             | L.....     | .....    | .....       | .....          | SARS-CoV-2 England/01           |
| 446 | .....                                                                                             | .....      | .....    | .....       | .....          | SARS-CoV-2 India/1-27           |
| 447 | .....                                                                                             | .....      | .....    | .....       | .....          | SARS-CoV-2 USA/WA-UW31          |
| 448 | .....                                                                                             | .....      | .....    | .....       | .....          | SARS-CoV-2 USA/WA-S19           |
| 449 | .....                                                                                             | .....      | .....    | .....       | .....          | SARS-CoV-2 USA/WA-S20           |
| 450 | .....                                                                                             | .....      | .....    | .....       | .....          | SARS-CoV-2 USA/WA-S22           |
| 451 | .....                                                                                             | .....      | .....    | .....       | .....          | SARS-CoV-2 USA/WA-S23           |
| 452 | .....                                                                                             | .....      | .....    | .....       | .....          | SARS-CoV-2 USA/WA-S58           |
| 453 | .....                                                                                             | .....      | .....    | .....       | .....          | SARS-CoV-2 USA/WA-S86           |
| 454 | .....                                                                                             | .....      | .....    | .....       | .....          | SARS-CoV-2 USA/WA-S106          |
| 455 | .....                                                                                             | .....      | .....    | .....       | .....          | SARS-CoV-2 USA/WA-S107          |
| 456 | .....                                                                                             | .....      | .....    | .....       | .....          | SARS-CoV-2 USA/WA-UW68          |
| 457 | .....                                                                                             | .....      | .....    | .....       | .....          | SARS-CoV-2 USA/WA-UW244         |
| 458 | .....                                                                                             | .....      | .....    | .....       | .....          | SARS-CoV-2 USA/WA-UW286         |
| 459 | .....                                                                                             | .....      | .....    | .....       | .....          | SARS-CoV-2 USA/WA-UW40          |
| 460 | .....                                                                                             | .....      | .....    | .....       | .....          | SARS-CoV-2 USA/WA-UW292         |
| 461 | .....                                                                                             | .....      | .....    | .....       | .....          | SARS-CoV-2 USA/WA-S28           |
| 462 | .....                                                                                             | .....      | .....    | .....       | .....          | SARS-CoV-2 USA/WA-S32           |
| 463 | .....                                                                                             | .....      | .....    | .....       | .....          | SARS-CoV-2 USA/WA-UW91          |
| 464 | .....                                                                                             | .....      | .....    | .....       | .....          | SARS-CoV-2 USA/WA-UW270         |
| 465 | .....                                                                                             | .....      | .....    | .....       | .....          | SARS-CoV-2 USA/WA-UW204         |
| 466 | .....                                                                                             | .....      | .....    | .....       | .....          | SARS-CoV-2 USA/WA-UW231         |
| 467 | .....                                                                                             | .....      | T.....   | .....       | T.....         | Bat SARS-like Yunnan/RaTG13     |
| 468 | .....                                                                                             | .....      | T.....   | .....       | T.....         | Pangolin SARS-like Guandong/1   |
| 469 |                                                                                                   |            |          |             |                |                                 |
| 470 |                                                                                                   |            |          |             |                |                                 |



| 510 | 430                                                                           | 440 | 450     | 460 | 470 |               |            |            |                    |                      |
|-----|-------------------------------------------------------------------------------|-----|---------|-----|-----|---------------|------------|------------|--------------------|----------------------|
| 511 | . . .   . . .   . . .   . . .   . . .   . . .   . . .   . . .   . . .   . . . |     |         |     |     |               |            |            |                    |                      |
| 512 | TGC                                                                           | VI  | AWNSNNL | DSK | VGG | NYNLYRLFRKSNL | KPFERDISTE | IYQAGSTP   | SARS-CoV-2         | Wuhan-Hu-1           |
| 513 | .                                                                             | .   | .       | .   | .   | .             | .          | .          | SARS-CoV-2         | France/IDF0372       |
| 514 | .                                                                             | .   | .       | .   | .   | .             | .          | .          | SARS-CoV-2         | France/IDF0373       |
| 515 | .                                                                             | .   | .       | .   | .   | .             | .          | .          | SARS-CoV-2         | France/IDF0372-isl   |
| 516 | .                                                                             | .   | .       | .   | .   | .             | .          | .          | SARS-CoV-2         | France/IDF0386-islP1 |
| 517 | .                                                                             | .   | .       | .   | .   | .             | .          | .          | SARS-CoV-2         | France/IDF0386-islP3 |
| 518 | .                                                                             | .   | .       | .   | .   | .             | .          | .          | SARS-CoV-2         | Hong Kong/VM20001061 |
| 519 | .                                                                             | .   | .       | .   | .   | .             | .          | R.         | SARS-CoV-2         | Wuhan/IVDC-HB-envF13 |
| 520 | .                                                                             | .   | .       | .   | .   | .             | .          | .          | SARS-CoV-2         | Shenzhen/SZTH-004    |
| 521 | .                                                                             | .   | .       | .   | .   | .             | .          | S.         | SARS-CoV-2         | Finland/FIN03032020A |
| 522 | .                                                                             | .   | .       | .   | .   | .             | .          | .          | SARS-CoV-2         | Wales/PHW27          |
| 523 | .                                                                             | .   | .       | .   | .   | .             | .          | .          | SARS-CoV-2         | England/01           |
| 524 | .                                                                             | .   | .       | .   | .   | .             | .          | .          | SARS-CoV-2         | India/1-27           |
| 525 | .                                                                             | .   | .       | .   | .   | .             | .          | .          | SARS-CoV-2         | USA/WA-UW31          |
| 526 | .                                                                             | .   | .       | .   | .   | .             | .          | .          | SARS-CoV-2         | USA/WA-S19           |
| 527 | .                                                                             | .   | .       | .   | .   | .             | .          | .          | SARS-CoV-2         | USA/WA-S20           |
| 528 | .                                                                             | .   | .       | .   | .   | .             | .          | .          | SARS-CoV-2         | USA/WA-S22           |
| 529 | .                                                                             | .   | .       | .   | .   | .             | .          | .          | SARS-CoV-2         | USA/WA-S23           |
| 530 | .                                                                             | .   | .       | .   | .   | .             | .          | .          | SARS-CoV-2         | USA/WA-S58           |
| 531 | .                                                                             | .   | .       | .   | .   | .             | .          | .          | SARS-CoV-2         | USA/WA-S86           |
| 532 | .                                                                             | .   | .       | .   | .   | .             | .          | .          | SARS-CoV-2         | USA/WA-S106          |
| 533 | .                                                                             | .   | .       | .   | .   | .             | .          | .          | SARS-CoV-2         | USA/WA-S107          |
| 534 | .                                                                             | .   | .       | .   | .   | .             | .          | .          | SARS-CoV-2         | USA/WA-UW68          |
| 535 | .                                                                             | .   | .       | .   | .   | .             | .          | .          | SARS-CoV-2         | USA/WA-UW244         |
| 536 | .                                                                             | .   | .       | .   | .   | .             | .          | .          | SARS-CoV-2         | USA/WA-UW286         |
| 537 | .                                                                             | .   | .       | .   | .   | .             | .          | .          | SARS-CoV-2         | USA/WA-UW40          |
| 538 | .                                                                             | .   | .       | .   | .   | .             | .          | S.         | SARS-CoV-2         | USA/WA-UW292         |
| 539 | .                                                                             | .   | .       | .   | .   | .             | .          | S.         | SARS-CoV-2         | USA/WA-S28           |
| 540 | .                                                                             | .   | .       | .   | .   | .             | .          | S.         | SARS-CoV-2         | USA/WA-S32           |
| 541 | .                                                                             | .   | .       | .   | .   | .             | .          | S.         | SARS-CoV-2         | USA/WA-UW91          |
| 542 | .                                                                             | .   | .       | .   | .   | .             | .          | S.         | SARS-CoV-2         | USA/WA-UW270         |
| 543 | .                                                                             | .   | .       | .   | .   | .             | .          | S.         | SARS-CoV-2         | USA/WA-UW204         |
| 544 | .                                                                             | .   | .       | .   | .   | .             | .          | S.         | SARS-CoV-2         | USA/WA-UW231         |
| 545 | .                                                                             | .   | .       | .   | .   | .             | .          | KHI.A.E.F. | Bat SARS-like      | Yunnan/RaTG13        |
| 546 | .                                                                             | .   | .       | .   | .   | .             | .          | .          | Pangolin SARS-like | Guandong/1           |
| 547 |                                                                               |     |         |     |     |               |            |            |                    |                      |
| 548 |                                                                               |     |         |     |     |               |            |            |                    |                      |
